# Supplementary material for: Correlation of Visible Reflectance Spectrometry and Portable Raman Data for Red Pigment Identification
Source: MDPI journal article supplement (doi:10.3390/heritage7040102), 2024-04-06
Supplement: s1 [file s1]

SUPPLEMENTARY MATERIAL

# Correlation of Visible Reflectance Spectrometry and Portable Raman Data for Red Pigment Identification

Anna M. Gueli<sup>1</sup>, Rosaria Galvagno<sup>1</sup>, Adriana Incardona<sup>1</sup>, Eleonora Pappalardo<sup>2</sup>, Giuseppe Politi<sup>1</sup>, Giuseppe Paladini<sup>1,\*</sup> and Giuseppe Stella<sup>1</sup>

<sup>1</sup> Department of Physics and Astronomy “Ettore Majorana”, University of Catania, Via S. Sofia 64, Catania 95123, Italy; anna.gueli@unict.it (A.G.), rosaria.galgagno@phd.unict.it (R.G.), adriana.incardona@phd.unict.it (A.I.), giuseppe.politi@ct.infn.it (G.P.), giuseppe.stella@dfa.unict.it (G.S.)

<sup>2</sup> Department of Educational Sciences, University of Catania, Via Teatro Greco 84, Catania 95124, Italy; eleonora.pappalardo@unict.it

\* Correspondence: giuseppe.paladini@dfa.unict.it

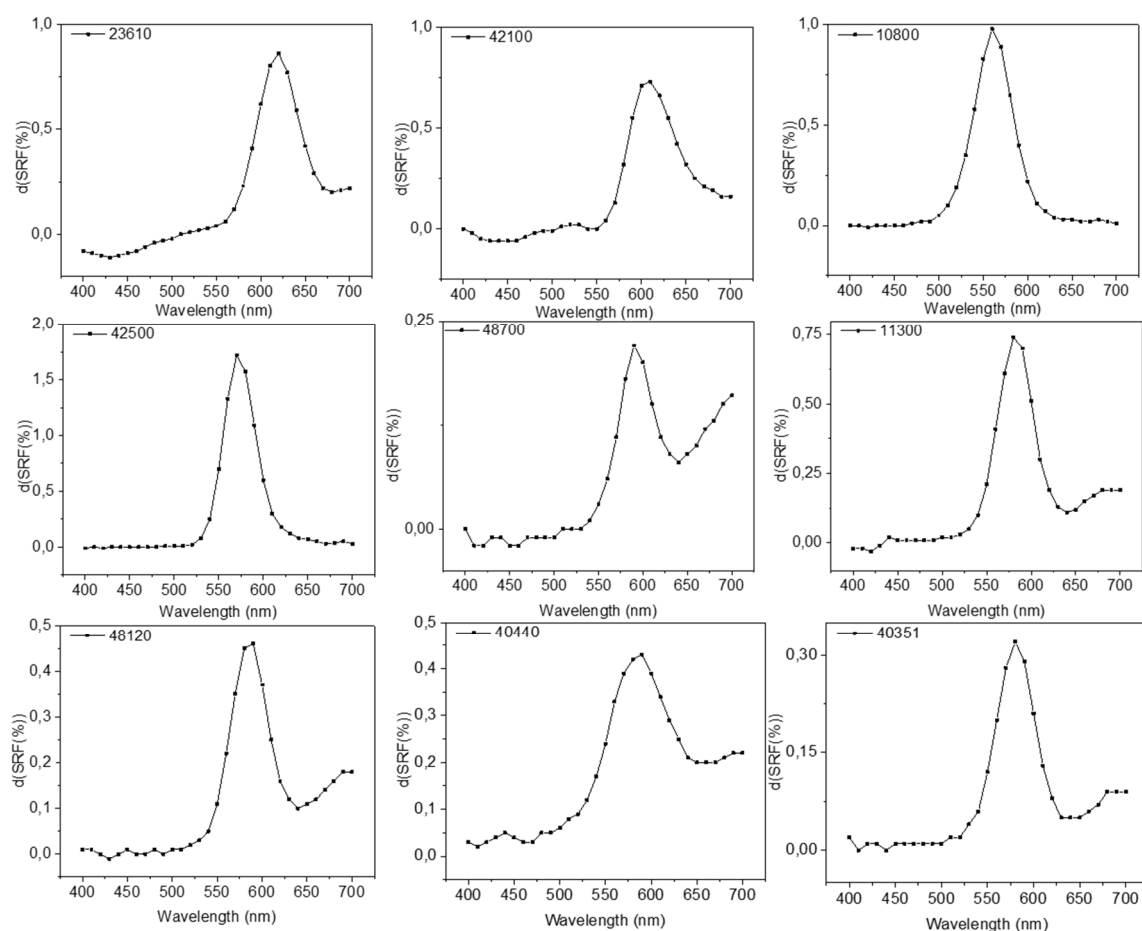

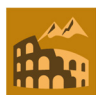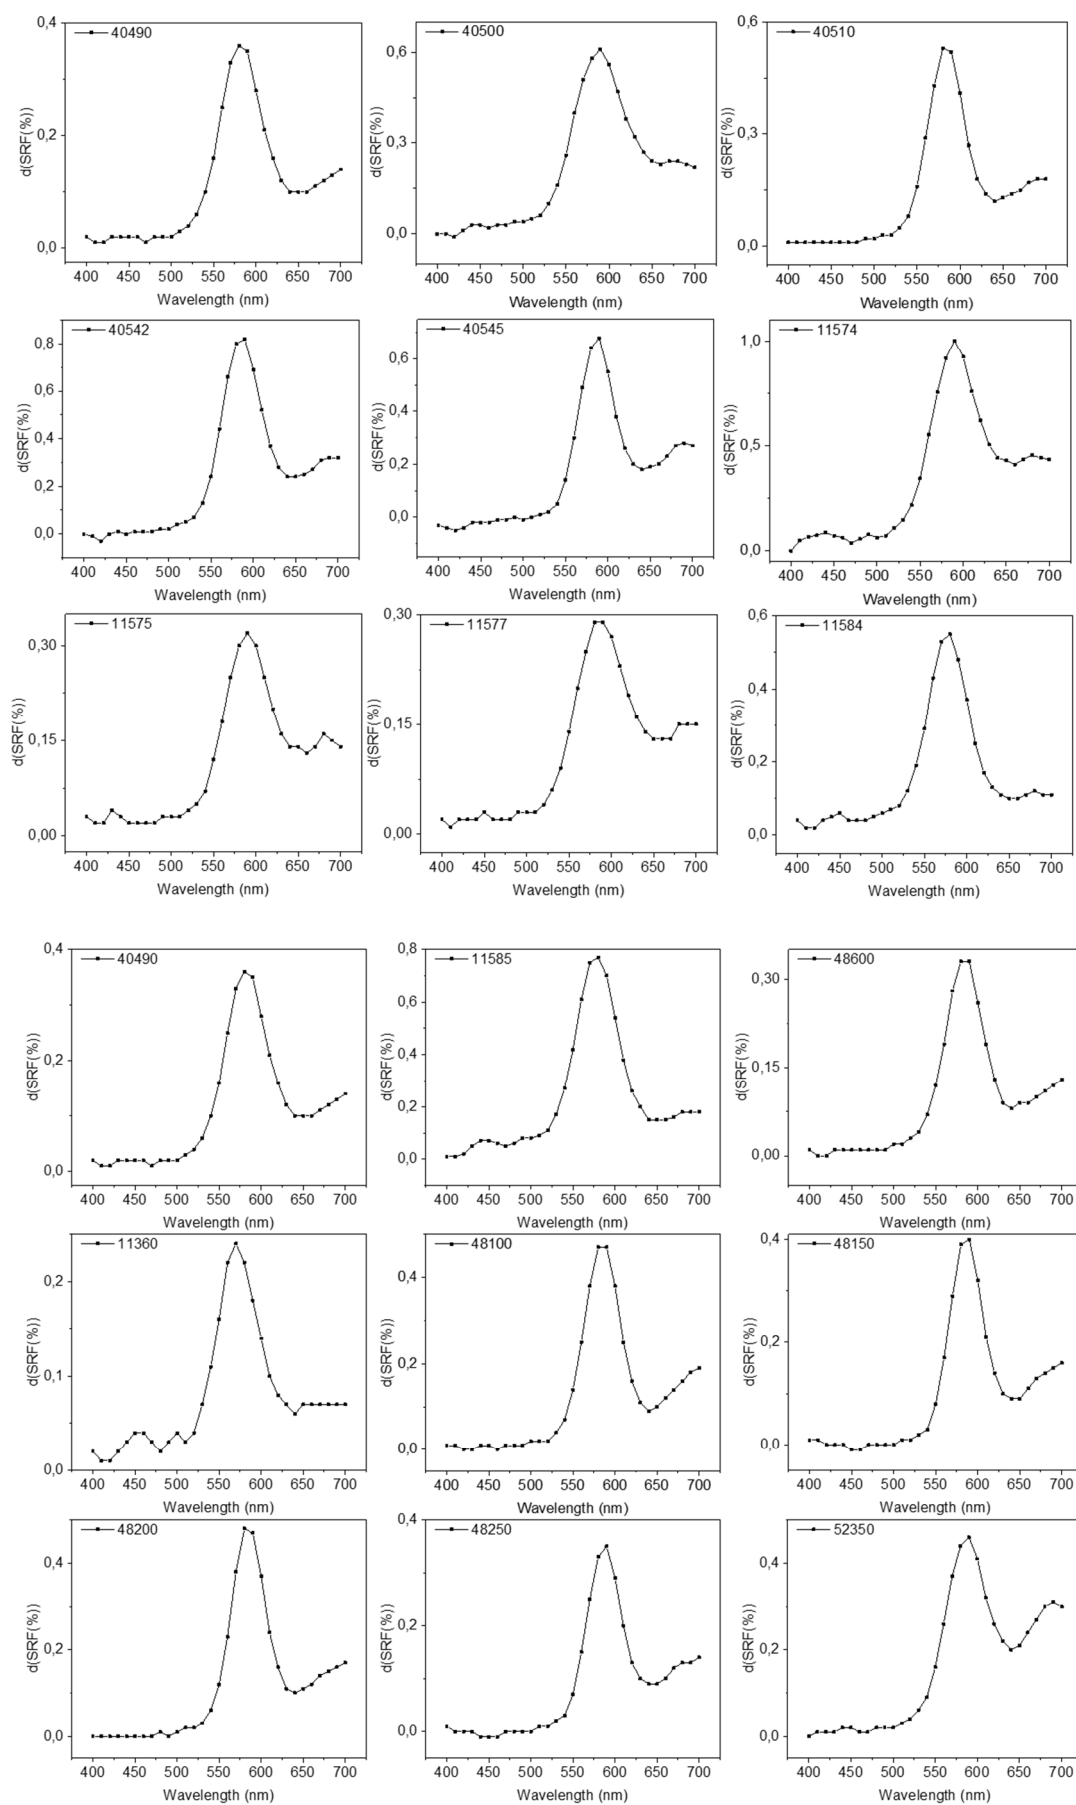

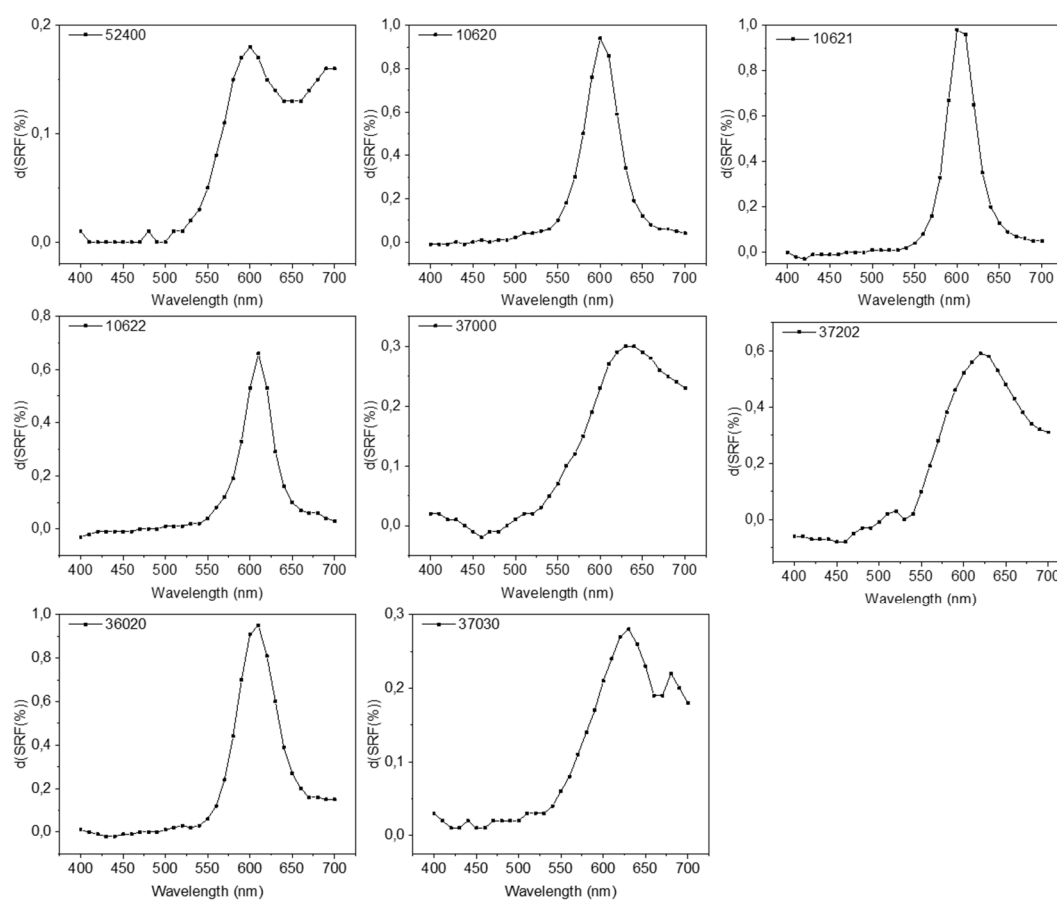

**Figure S1.** Profiles of the first derivative of spectral reflectance factor behavior of the 35 powdered samples reported in Table 1.
